# Supplementary material for: The structural chemistry of organotin derivatives of 5-mercapto-3-phenyl-1,3,4-thiadiazoline-2-thione: supramolecular structures involving intermolecular Sn⋯S, N–H⋯S or S⋯S interactions
Source: Royal Society of Chemistry journal article supplement (doi:10.1039/b109726a), 2002-01-01
Supplement: b109726a.doc [file b109726a.doc]

# **The Structural Chemistry of Organotin Derivatives of *5*-mercapto-*3*-phenyl-*1,3,4*-thiadiazoline-*2*-thione: Supramolecular Structures Involving Intermolecular SnS, N-HS or SS Interactions.**

Vasile Berceanca, Crina Crainicb, Ionel Haiducb,Mary F. Mahonc, Kieran C. Molloyc, Monica M. Venterb,c* and Paul J. Wilsonc

*a Department of Chemistry, Technical University of Timisoara, RO-1900 Timisoara, Romania*

##### bDepartment of Chemistry, “Babes-Bolyai” University of Cluj, RO-3400 Cluj-Napoca, Romania

*c* Department of Chemistry, University of Bath, Bath BA2 7AY, UK

Electronic Supplementary Information

## Discussion of Spectral Data

IR spectra of PhN2C2S3K and compounds **1** – **9** were recorded in the 3500 – 400 cm-1 spectral region. The assignment of (C-N), (C=S) and (C-S) stretching modes in the IR spectrum of PhN2C2S3K at 1352, 1046 and 683 cm-1, respectively, is in good agreement with the vibrational data published for Bismuthiol II and similar mercapto-thiazole derivatives1, 2A comparison of the IR spectra of **1** – **8** with that of the starting material reveals the negative shift of the (C-S) band by up to 16 cm-1 suggesting the metal coordination by the thiol group. Further coordination of the ligand through the thione group (C=S) in **5** – **7** is implied by the lowering of the (C=S) mode by up to 15 cm-1. Conversely, the positive shift of (C=S) (1055 – 1061 cm**-1**) and negative shift of (C-N) (1340 – 1350 cm**-1**) modes in the spectra of **1** – **4** indicate the lack of any C=SSn bonding. Further spectral data for **1** – **8** as well as crystallographic analysis of **1** - **3**, **7** and **8** support this interpretation. Nevertheless, the (C=S) mode in the spectrum of **8** is shifted to a lower frequency (1027 cm-1) despite the monodentate coordination of the ligand. The IR spectrum of **9** reveals the negative shift of both (C=S) and (C-S) stretching modes (1031 and 664 cm-1, respectively) which originates from N-HS interactions evident in the crystal structure (*see below*).

The Mössbauer spectra for compounds **1** – **9** have isomer shifts (i.s.) between 1.12 and 1.52 mm s-1 which confirm the +4 oxidation state of the tin atom. The quadrupole splittings (q.s.) of the mono- and diorganotin complexes of **I** (**1** – **4**)range from 1.93 to 2.85 mm s-1 suggesting different coordination geometries about tin.3 Thus, the q.s. value of **1** (1.93 mm s-1) ambiguously falls in all tetrahedral, trigonal-bipyramidal and octahedral ranges proposed for RSnX3 derivatives.3 Comparison with monoorganotin sesquisulfides, (RSnS1.5)4 containing tetrahedral RSnS3 fragments (q.s. 1.2 – 1.5 mm s-1) and stannatranes, RSn(OCH2CH2)3N containing *trans*-NCSnO3 units (q.s. 1.92 - 2.00 mm s-1)4 suggests an expansion of the tetrahedral coordination environment about tin in **1**. The weak anisobidentate *S,N-* chelation of two ligands evidenced by X-ray diffraction analysis supports this interpretation. Similar additional bonding can be predicted for **2** – **4**; the q.s. values of **2** (2.49 mm s-1) and **4** (2.67 mm s-1) fall close to those reported for R2Sn(*2*-SPy)2 (R = Ph, q.s. 2.31 and R = Me, 2.56 mm s-1)5 and Me2Sn(*2*-SPyNHCOCH3-*5*)2 (q.s. 2.73 mm s-1)6 where the *S,N*- chelation of the ligands is evident. Furthermore, the Mössbauer spectrum of **3** displays two doublets, the corresponding q.s. values (2.26, 2.85 mm s-1) being comparable to those found for the *cis*-octahedral (q.s. 2.07 mm s-1) and *trans*-octahedral (q.s. 3.00 mm s-1) tin centres proposed for dibuthyltin-bis(*2*-mercaptobenzothiazole).6 A better estimate of the coordination geometry in **2** – **4** can be derived from the calculated CSnC bond angles;7 the CSnC angles of 118 (**2**) and 119 (**4**) are in excellent agreement with the crystallographically determined value for **2** [117.7(4)] while those calculated for **3** (105, 124) are less accurate [crystallographic data: 126.1(2) and 136.7(2)].

However, all data point toward a very distorted octahedral coordination geometry about tin in **2** – **4** and evidence the presence of two slightly different coordinated metal centres in **3**. The q.s. values for **5** – **9** fall in the narrow range of 2.85 – 3.15 mm s-1 consistent with a *trans*-trigonal bipyramidal X2SnC3 (X = N and/or S) coordination geometry around tin.3 For comparison, q.s. values of organotin thiotetrazoles (*trans*-NSSnC3, 3.14 - 3.35 mm s-1)8, 9 and cationic organotin adducts [R3SnD2]+ (D = *4*-picoline, *2,2’*-bipy, *2,2’*-phen) (*trans*-N2SnC3, 2.80 - 2.88 mm s-1)10 fall close to the corresponding data found for **5** – **9**. Such coordination geometry of the metal centre can only be achieved by axial binding of the exocyclic S atoms of the ligand (**5** – **7**) and/or the ring nitrogens of pyridine-based donors (**8**, **9**).

The 119Sn NMR spectrum of **1** recorded in CDCl3 [(119Sn) -10.2 ppm] shows a lower frequency chemical shift than, for example, tetrahedral monoorganotin thiolates, RSn(SR’)3 [(119Sn) 65 – 167 ppm]11 suggesting some additional coordination about tin, but not as marked as BuSn[S(O)CPh]3 [(119Sn) -175 ppm].11 In a similar manner, the NMR data recorded in CDCl3 for **2** – **4** suggest the same weak anisobidentate chelation of **I** in solution. Thus, the (119Sn) values of **2** – **4** [-84.8 (**2**), 59.2 (**3**) and 71.2 (**4**)] are intermediate between those of four-coordinated diorganotin dithiolates [(119Sn) 122 – 144 ppm] and six-coordinated diorganotin bis(dithiocarbamates) [e.g. Me2Sn(SCSNEt2)2, (119Sn) -336 ppm].11, 12 Moreover, the weakness of these unsymmetric chelations is supported by the higher frequency 119Sn chemical shift of **2** - **4** when compared to those of diorganotin thiotetrazoles, R2Sn(SCN4Ph)2 [(119Sn), R = Bu, –27.7; R = Ph, –145.3 ppm]8 or thiocarboxylates, R2Sn[S(O)CPh]2 [(119Sn), R = Ph, –206; R = Bu, –97; R = Me –80 ppm],11 all revealing expanded coordination geometry about tin in solution. The angles CSnC [121.5 (**3**) and 116.8 (**4**)] calculated from 1J(Sn-C) [468.1 (**3**) and 448.4 Hz (**4**)] or 2J(Sn-C-H) [66.4 Hz (**4**)]13, 14 compare favourably with the corresponding values calculated from Mössbauer data and also imply that additional coordination in **2** – **4** is weak. Conversely, any intermolecular interactions in solid **5** – **8** are lost in solution and show that these compounds are all tetrahedral monomers in solution as specified by their higher frequency 119Sn chemical shift values [-62.4 (**5**), 120.5 (**6**), 126.1 (**7**) and 77.6 ppm (**8**)]. Comparison with data for solutions of organotin thiotetrazoles [(119Sn), R = alkyl, 109.8 - 122.8; R = Ph, from –65.0 to -69.4 ppm] 8, 9 or organotin trithiotriazines [(119Sn), R = alkyl, 68.3 - 74.4; R = Ph, –100.5 ppm]15 serves to endorse this interpretation. Furthermore, using the methodology of Lockhart13 and Holecek14 the values of 1J(Sn-C) (325.0 – 364.7 Hz) and 2J(Sn-C-H) (56.2 – 59.7 Hz) couplings in **6** – **8** afforded CSnC angles of 107.1 – 108.7 and 110.1 – 112.0, respectively which are consistent with a tetrahedral coordination geometry around tin. The 119Sn NMR spectrum of **9** recorded in (CD3)2SO solution reveals a lower frequency 119Sn chemical shift value (-47.1 ppm) consistent with a *trans*-trigonal bipyramidal environment about tin in solution [*cf*. trimethyltin tetrazoles, (119Sn) -43.8 to -49.0 ppm].16, 17 Moreover, the CSnC angles of 121.4 and 116.6 calculated from 1J(Sn-C) (509.0 Hz) and 2J(Sn-C-H) (66.3 Hz) couplings,13 respectively endorse a trigonal-planar arrangement of methyl groups about tin, although solvent coordination cannot be excluded in this instance.

The 1H and 13C NMR data for compounds **1** – **9** are largely unexceptional. However, the  185.3 – 187.2 (C-S) and  155.1 – 158.8 (C=S) values in the 13C spectra confirm the incorporation of the heterocyclic unit by comparison with the corresponding data reported for related mercaptothiolate complexes [*cf*. C3N3S3(SnR3)3,15 and [(C3N3S3H){Co(en)2}2][ClO4]3. 2H2O18:  179.7 – 188.9 ppm (C-S),  159.8 – 160.6 ppm (C=S)]. In addition, the 1H NMR spectrum of **9** recorded in (CD3)2SO solution shows one downfield NH2 proton signal ( 6.75 ppm *vs*. 6.19 ppm for *4*-H2NPy) which suggest that the intermolecular N-HS hydrogen bonds are retained even in solution.

### References

1M. M. Osman, M. A. Makhyoun, and A. B. Tadros, *Bull. Soc. Chim. Fr.*, 1980, **11-12**, I.

2E. S. Rasper, *Coord. Chem. Rev.*, 1985, **61**, 115.

3R. V. Parish, 'NMR, NQR, EPR and Mossabuer Spectroscopy in Inorganic Chemistry', Ellis Horwood, 128.

4A. G. Davies, L. Smith, and P. J. Smith, *J. Organomet. Chem.*, 1972, **39**, 279.

5F. P. Mullins, *J. Inorg. Nucl. Chem.*, 1979, **41**, 463.

6J. Domazetis, R. J. Magee, B. D. James, and J. D. Cashion, *J. Inorg. Nucl. Chem.*, 1981, **43**, 1351.

7T. K. Sham and G. M. Bancroft, *Inorg. Chem.*, 1975, **14**, 2281.

8R. J. Deeth, K. C. Molloy, M. F. Mahon, and S. Whitaker, *J. Organometal. Chem.*, 1992, **430**, 25

9S. Bhandari, M. F. Mahon, J. G. McGinley, K. C. Molloy, and C. E. Roper, *J. Chem. Soc., Dalton Transactions*, 1998, 3425.

10T. S. Basu Baul, D. Dey, D. D. Mishra, W. L. Basaiawmoit, and E. Rivarola, *J. Organometal. Chem.*, 1993, **447**, 9.

11D. K. Srivastava, V. D. Gupta, H. Nöth, and W. Rattay, *J. Chem. Soc., Dalton Trans.*, 1988, 1533.

12A. G. Davies and P. J. Smith, in 'Tin', ed. G. Wilkinson, F. G. A. Stone, and E. W. Abel, Oxford, 1982.

13T. P. Lockhart and W. F. Manders, *Inorg. Chem.*, 1986, **25**, 892.

14J. Holecek and A. Lycka, *Inorg. Chim. Acta*, 1986, **118**, L15.

15I. Haiduc, M. F. Mahon, K. C. Molloy, and M. M. Venter, *J. Organomet. Chem.*, 2001, **627**, 6.

16M. Hill, M. F. Mahon, and K. C. Molloy, *J. Chem. Soc., Dalton Trans.*, 1996, 1857.

17A. Goodger, M. Hill, M. F. Mahon, J. G. McGinley, and K. C. Molloy, *J. Chem. Soc., Dalton Trans.*, 1996, 847.

18K. Yamanari, Y. Kushi, M. Yamamoto, A. Fuyuhiro, S. Kaizaki, T. Kawamoto, and Y. Kushi, *J. Chem. Soc., Dalton Trans.*, 1993, 3715.
